# Supplementary material for: Trajectories of self-reported suicide risk with interpretative and predictive values for subsequent suicide attempts: A retrospective cohort study among crisis hotline callers in China
Source: Research Square preprint supplement (doi:10.21203/rs.3.rs-7923703/v1), 2025-11-11
Supplement: Supplementary file 1 [file 4cac3015ccd8c684c1db7c57.docx]

**Additional file**

[Table S1. The levels and description of selected variables for analysis 2](#_Toc148742474)

[Figure S1. The hot map of correlations among baseline variables 4](#_Toc243795410)

[Table S2. Comparison of baseline characteristics between callers included and excluded for the main analysis 5](#_Toc70657394)

[Table S3. Fit indices and class proportions for LCMM with 2-4 classes 8](#_Toc2127847814)

[Table S3. The baseline characteristics of participants stratified by suicide risk trajectory classes 9](#_Toc693036407)

[Table S4. Standard mean difference of baseline characteristic of 1,235 callers before and after inverse probability weighting 11](#_Toc2059074768)

[Figure S2. Trajectories of self-reported suicide scores with 95% CI identified based on sensitivity analysis. 13](#_Toc170654371)

[Table S5. The associations between identified determinants with subsequent SAs of callers reported suicidality based on the univariable Cox regression 14](#_Toc1297344652)

[Table S6. Associations between identified determinants with subsequent SAs of crisis hotline callers based on COX regression with and without IPW 16](#_Toc1070098173)

[Figure S3. The forest plot of IPW-COX model with call duration unadjusted 18](#_Toc2111933633)

[Table S7. The performance comparison of XGBoost model for subsequent suicide attempts prediction 19](#_Toc1658852215)

[Figure S4. ROC curve of XGBoost model 19](#_Toc1696472151)

[Table S8. The mean absolute SHAP values of variables of XGboost model for subsequent suicide attempt prediction 20](#_Toc467060638)

# Table S1. The levels and description of selected variables for analysis

| Variable | **Description** | **Level** |
| --- | --- | --- |
| Sex | Sex reported by callers | Male = 1 |
| Female = 2 |
| Call duration (min) | The total duration of the initial call dialed by the high-risk callers | - |
| Marital Status | The status of marriage of callers | Unmarried = 1 |
| Married =2 |
| Divorced/Other =3 |
| Job | Job of callers | Unemployed = 1 |
| Student = 2 |
| Civil servant = 3 |
| Service industry = 4 |
| Retired/Other =5 |
| Mental disorder history | The main mental disorder that called diagnosed | Unknown = 1 |
| Depression = 2 |
| D&A(Depression and Anxiety disorder) = 3 |
| Bipolar disorder = 4 |
| Other (PSTD, Schizophrenia and Obsessive compulsive disorder ) = 5 |
| Region | The region that callers lived at the initial call | Guangdong Province =1 |
| Outside Guangdong Province =2 |
| Suicidality | The suicidal acts were self-reported by caller | Attempts =1 |
| Ideation = 2 |
| Plan = 3 |
| Season of call | The season when the initial call dialed. | Spring =1: March to May |
| Summer = 2: June to August |
| Autumn = 3: September to November |
| Winter =4: December to February |
| Time of call | The exact time when the initial call was dialed | Morning =1: 8 AM-12 PM |
| Afternoon = 2:1PM-5 PM |
| Night =3: 6 PM-11 PM |
| Dawn =4: 0 AM-7 AM |
| Mood when calling | The mood of the caller when initially dialed, recorded by the hotline operator | Depressed =1 |
| Anxious =2 |
| Clam =3 |
| Other (Fear, anger, and excitement) =4 |
| Query | The main issues consulted by the called | Economic issues =1 (Bankrupt, debt, etc) |
| Relationship =2  (Romantic relationship and marital issue) |
| Mental illness =3; |
| Distress issues =4  (Work&study stress or negative issues) |


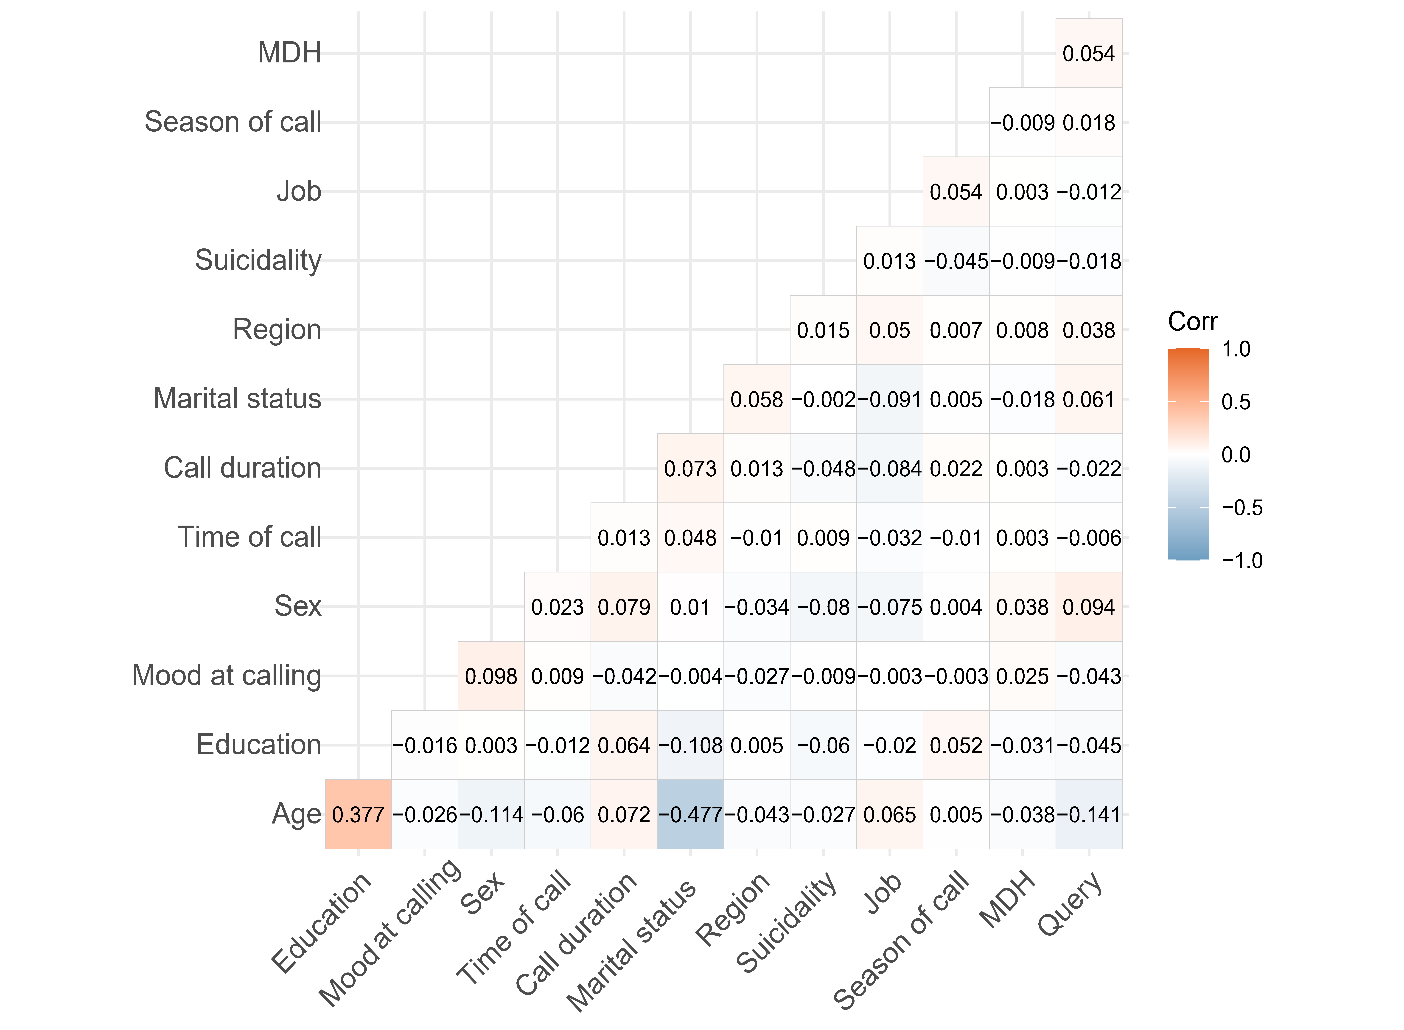


Note: Abbreviation: MDH- Mental disorder history

# Figure S1. The hot map of correlations among baseline variables

# Table S2. Comparison of baseline characteristics between callers included and excluded for the main analysis

| **Variable** | **Median [IQR]/ N (%)** | | ***W*/χ2** | ***P*** |
| --- | --- | --- | --- | --- |
| **Excluded**  **(N=2820)** | **Included**  **(N=1235)** |
| Age†, years | 23.00  [18.00-28.00] | 23.00  [18.00-28.00] |  |  |
|  |  |  | 1500369.50 | 0.197 |
| Call duration†, min | 36.00  [23.00-50.00] | 43.00  [31.00-54.00] |  |  |
|  |  |  | 1400811.50 | <0.001* |
| Suicide risk score at the index call† | 9.00  [7.00-10.00] | 8.00  [7.00-9.50] |  |  |
|  |  |  | 156745.50 | 0.123 |
| Suicide risk score at 1st follow-up† | 4.00  [1.00-6.50] | 4.50  [1.00-7.00] |  |  |
|  |  |  | 491993.00 | <0.001* |
| Suicide risk score at 2nd follow-up† | 3.00  [1.00-6.00] | 3.50  [1.00-6.00] |  |  |
|  |  |  | 432077.00 | 0.035* |
| Suicide risk score at 3rd follow-up† | 1.00  [1.00-6.00] | 3.00  [1.00-6.00] |  |  |
|  |  |  | 353814.50 | 0.029* |
| Suicide risk score at 4th follow-up† | 1.00  [1.00-6.00] | 1.05  [1.00-6.00] |  |  |
|  |  |  | 314789.00 | 0.101 |
|  |  |  |  |  |
| Sex |  |  |  |  |
| Male | 1326 (47.0%) | 517 (41.9%) |  |  |
| Female | 1494 (53.0%) | 718 (58.1%) |  |  |
|  |  |  | 9.01 | 0.003* |
|  |  |  |  |  |
| Job |  |  |  |  |
| Student | 863 (30.6) | 461 (37.3) |  |  |
| Civil servant | 282 (10.0) | 75 (6.1) |  |  |
| Service industry | 301 (10.7) | 81 (6.6) |  |  |
| Unemployed | 941 (33.4) | 367 (29.7) |  |  |
| Retired/Other | 433 (15.3) | 251 (20.3) |  |  |
|  |  |  | 63.56 | <0.001* |
| Marital Status |  |  |  |  |
| Unmarried | 2064 (73.2) | 1004 (81.3) |  |  |
| Married | 387 (13.7) | 130 (10.5) |  |  |
| Divorced | 369 (13.1) | 101 (8.2) |  |  |
|  |  |  | 33.97 | <0.001* |
| Mental disorder history |  |  |  |  |
| Depression | 547 (19.4) | 275 (22.3) |  |  |
| Depression &Anxiety | 132 (4.7) | 53 (4.3) |  |  |
| Bipolar Mood Disorder | 231 (8.2) | 120 (9.7) |  |  |
| Other | 46 (1.6) | 53 (4.3) |  |  |
| Unknown | 1864 (66.1) | 734 (59.4) |  |  |
|  |  |  | 12.60 | 0.134 |
| Region |  |  |  |  |
| Guangdong Province | 1630 (57.8) | 702 (56.8) |  |  |
| Outside Guangdong | 1190 (42.2) | 533 (45.2) |  |  |
|  |  |  | 0.29 | 0.593 |
| Time of Call |  |  |  |  |
| Morning | 347 (12.3) | 178 (14.4) |  |  |
| Afternoon | 889 (31.5) | 409 (33.1) |  |  |
| Night | 732 (26.0) | 342 (27.7) |  |  |
| Dawn | 852 (30.2) | 306 (24.8) |  |  |
|  |  |  | 13.49 | 0.004* |
| Season of Call |  |  |  |  |
| Spring | 310 (11.0) | 215 (17.4) |  |  |
| Summer | 328 (11.6) | 158 (12.8) |  |  |
| Autumn | 373 (13.2) | 136 (11.0) |  |  |
| Winter | 1809 (64.1) | 726 (58.8) |  |  |
|  |  |  | 25.49 | <0.001* |
| Mood when calling |  |  |  |  |
| Anxious | 153 (5.4) | 58 (4.7) |  |  |
| Depressed | 1725 (61.2) | 682 (55.2) |  |  |
| Clam | 809 (28.7) | 436 (35.3) |  |  |
| Other | 133(4.7) | 59 (4.8) |  |  |
|  |  |  | 30.51 | <0.001* |
| Query |  |  |  |  |
| Mental illness | 1634(57.9) | 793 (64.2) |  |  |
| Relationship | 719(25.5) | 252 (20.4) |  |  |
| Economic issues | 210(7.5) | 56 (4.5) |  |  |
| Distress issues | 257(9.1) | 134 (10.9) | 20.52 | <0.001* |
|  |  |  |  |  |
| Suicidality¶ |  |  |  |  |
| Attempt | 241(8.5) | 83 (6.7) |  |  |
| Ideation | 1885 (66.8) | 936 (75.8) |  |  |
| Plan | 694(25.7) | 216 (17.5) |  |  |
|  |  |  | 32.86 | <0.001* |
| Suicide attempt at 1st follow-up |  |  |  |  |
| No | 2685 (95.2) | 1202 (97.3) |  |  |
| Yes | 90 (3.2) | 32 (2.6) |  |  |
| NA | 45 (1.6) | 1 (0.1) | 1.01 | 0.314 |
|  |  |  |  |  |
| Suicide attempt at 2nd follow-up |  |  |  |  |
| No | 2658 (94.3) | 1175 (95.1) |  |  |
| Yes | 92 (3.3) | 57 (4.6) |  |  |
| NA | 70 (2.5) | 3 (0.2) |  |  |
|  |  |  | 3.53 | 0.060 |
| Suicide attempt at 3rd follow-up |  |  |  |  |
| No | 2687 (95.3) | 1202 (97.3) |  |  |
| Yes | 53 (1.9) | 26 (2.1) |  |  |
| NA | 80 (2.8) | 7 (0.6) | 0.07 | 0.796 |
|  |  |  |  |  |
| Suicide attempt at 4th follow-up |  |  |  |  |
| No | 2669 (94.6) | 1194 (96.7) |  |  |
| Yes | 70 (2.5) | 33 (2.7) |  |  |
| NA | 81 (2.9) | 8 (0.7) |  |  |
|  |  |  | 0.02 | 0.891 |
| Suicide attempts over the entire follow-up |  |  |  |  |
| No | 2507 (88.9) | 1113 (90.1) |  |  |
| Yes | 270 (9.6) | 122 (9.9) |  |  |
| NA | 43 (1.5) | 0(0) |  |  |
|  |  |  | 0.01 | 0.924 |

Note: Variables marked as † are described by Median (IQR) due to the abnormal distribution and the difference between groups was examined by the *Wilcoxon rank-sum* *Test*; Categorical variables are presented as n (%),and examined by the *Chi-Square* test.

¶Suicidality indicates that callers have reported suicide attempts, plans and ideation in the index call.

**P*<0.05

# Table S3. Fit indices and class proportions for LCMM with 2-4 classes

| Type | Class number | AIC | BIC | aBIC | Entropy | LMR(*P*) | Class proportion (%) |
| --- | --- | --- | --- | --- | --- | --- | --- |
| 1 | 2 | 20659.97 | 20695.80 | 20673.57 | 0.683 | <0.001 | 63.5/31.5 |
| 3 | 20630.82 | 20682.02 | 20650.25 | 0.609 | <0.001 | 23.8/58.1/18.1 |
| 4 | 20630.95 | 20697.49 | 20656.20 | 0.498 | 0.118 | 51.8/5.8/16.1/26.2 |
|  |  |  |  |  |  |  |  |
| 2 | 2 | 19819.52 | 19865.59 | 19837.00 | 0.748 | <0.001 | 65.4/35.6 |
| **3** | **19695.84** | **19762.38** | **19721.09** | **0.668** | **<0.001** | **30.0/58.0/12.0** |
| 4 | 19625.62 | 19712.64 | 19658.64 | 0.670 | <0.001 | 50.9/9.7/18.0/21.4 |

Note: Type 1 models were established considering the linear fixed effect of “time”; Type2 models added time² as a fixed/mixed effect to capture the nonlinear growth.

# Table S3. The baseline characteristics of participants stratified by suicide risk trajectory classes

| **Variable** | **Median [IQR]/ N (%)** | | | | ***χ2*** | ***P*** |
| --- | --- | --- | --- | --- | --- | --- |
| **All** | **Rapid decline Group** | **Gradual Decline Group** | **Constant high-risk Group** |
| **Continuous Variable** |  |  |  |  |  |  |
| Age, years† | 23.00  [18.00,28.00] | 22.50 [17.00,27.00] | 23.00 [19.00,28.00] | 21.00 [17.00,27.00] |  |  |
|  |  |  |  |  | 18.29 | <0.001* |
| Call duration†, min | 43.00 [31.00,54.00] | 45.00 [32.00,55.00] | 43.00 [31.00,54.00] | 42.00 [29.00,54.00] |  |  |
|  |  |  |  |  | 1.29 | 0.38 |
| **Categorical Variable** |  |  |  |  |  |  |
| Sex |  |  |  |  |  |  |
| Male | 517 (41.86) | 310 (43.30) | 55 (37.16) | 152 (40.97) |  |  |
| Female | 718 (58.14) | 406 (56.70) | 93 (62.84) | 219 (59.03) |  |  |
|  |  |  |  |  | 2.07 | 0.36 |
| Job |  |  |  |  |  |  |
| Student | 461 (37.33) | 240 (33.52) | 57 (38.51) | 164 (44.2) |  |  |
| Civil servant | 75 (6.07) | 47 (6.56) | 7 (4.73) | 21 (5.66) |  |  |
| Service industry | 81 (6.56) | 55 (7.68) | 8 (5.41) | 18 (4.85) |  |  |
| Unemployed | 367 (29.72) | 211 (29.47) | 49 (33.11) | 107 (28.84) |  |  |
| Retire/Other | 251 (20.32) | 163 (22.77) | 27 (18.24) | 61 (16.44) |  |  |
|  |  |  |  |  | 17.54 | 0.025* |
| Marital Status |  |  |  |  |  |  |
| Unmarried | 1004 (81.30) | 581 (81.15) | 117 (79.05) | 306 (82.48) |  |  |
| Married | 130 (10.53) | 74 (10.34) | 20 (13.51) | 36 (9.70) |  |  |
| Divorced | 101 (8.18) | 61 (8.52) | 11 (7.43) | 29 (7.82) |  |  |
|  |  |  |  |  | 1.94 | 0.75 |
| Region |  |  |  |  |  |  |
| Guangdong Province | 702 (56.84) | 416 (58.1) | 73 (49.32) | 213 (57.41) |  |  |
| Outside Guangdong | 533 (45.16) | 300 (41.9) | 75 (50.68) | 158 (42.59) |  |  |
|  |  |  |  |  | 3.92 | 0.14 |
| Mental disorder history |  |  |  |  |  |  |
| Depression | 275 (22.27) | 134 (18.72) | 45 (30.41) | 96 (25.88) |  |  |
| Depression&Anxiety | 53 (4.29) | 27 (3.77) | 9 (6.08) | 17 (4.58) |  |  |
| Bipolar Disorder | 120 (9.72) | 58 (8.10) | 19 (12.84) | 43 (11.59) |  |  |
| Other | 53 (4.29) | 24 (3.35) | 8 (5.41) | 21 (5.66) |  |  |
| Unknown | 734 (59.43) | 473 (66.06) | 67 (45.27) | 194 (52.29) |  |  |
|  |  |  |  |  | 34.00 | <0.001* |
| Time of Call |  |  |  |  |  |  |
| Morning | 178 (14.41) | 95 (13.27) | 17 (11.49) | 66 (17.79) |  |  |
| Afternoon | 409 (33.12) | 230 (32.12) | 48 (32.43) | 131 (35.31) |  |  |
| Night | 342 (27.69) | 207 (28.91) | 45 (30.41) | 90 (24.26) |  |  |
| Dawn | 306 (24.78) | 184 (25.70) | 38 (25.68) | 84 (22.64) |  |  |
|  |  |  |  |  | 8.57 | 0.20 |
| Season of Call |  |  |  |  |  |  |
| Spring | 215 (17.41) | 112 (15.64) | 26 (17.57) | 77 (20.75) |  |  |
| Summer | 158 (12.79) | 101 (14.11) | 21 (14.19) | 36 (9.70) |  |  |
| Autumn | 136 (11.01) | 74 (10.34) | 16 (10.81) | 46 (12.41) |  |  |
| Winter | 726 (58.79) | 429 (59.92) | 85 (57.43) | 212 (57.14) |  |  |
|  |  |  |  |  | 8.95 | 0.18 |
| Mood at call |  |  |  |  |  |  |
| Anxious | 58 (4.70) | 31 (4.33) | 7 (4.73) | 20 (5.39) |  |  |
| Depressed | 682 (55.22) | 403 (56.28) | 74 (50.00) | 205 (55.26) |  |  |
| Clam | 436 (35.30) | 246 (34.36) | 57 (38.51) | 133 (35.85) |  |  |
| Other | 59 (4.78) | 36 (5.03) | 10 (6.76) | 13 (3.50) |  |  |
|  |  |  |  |  | 4.68 | 0.59 |
| Query |  |  |  |  |  |  |
| Mental illness | 793 (64.22) | 424 (59.22) | 100 (67.57) | 269 (72.51) |  |  |
| Relationship | 252 (20.40) | 173 (24.16) | 29 (19.59) | 50 (13.48) |  |  |
| Economic issues | 56 (4.53) | 31 (4.33) | 6 (4.05) | 19 (5.12) |  |  |
| Distress issues | 134 (10.85) | 88 (12.29) | 13 (8.78) | 33 (8.89) |  |  |
|  |  |  |  |  | 24.43 | <0.001* |
| Suicidality |  |  |  |  |  |  |
| Attempt | 83 (6.72) | 39 (5.45) | 7 (4.73) | 37 (9.97) |  |  |
| Ideation | 936 (75.79) | 571 (79.75) | 115 (77.70) | 250 (67.39) |  |  |
| Plan | 216 (17.49) | 106 (14.80) | 26 (17.57) | 84 (22.64) |  |  |
|  |  |  |  |  | 22.03 | <0.001* |

Note: **P*<0.05. †The distribution of these variables was abnormal, and they were thus described by Median[IQR], and the comparison was conducted using the *Kruskal-Wallis test*; Categorical variables are presented as n (%),and examined by the *Chi-Square* test.

# Table S4. Standard mean difference of baseline characteristic of 1,235 callers before and after inverse probability weighting

| **Variable** | **Unadjusted Difference** | **Adjusted Difference** | **SMD** |
| --- | --- | --- | --- |
|  |  |  |  |
| Age | -0.042 | -0.023 | <0.1 |
|  |  |  |  |
| Sex |  |  |  |
| Female | 0.052 | 0.061 | <0.1 |
| Male |  |  |  |
|  |  |  |  |
| Job |  |  |  |
| Student | 0.067 | 0.081 | <0.1 |
| Civil servants | 0.029 | 0.032 | <0.1 |
| Service industry | -0.002 | -0.006 | <0.1 |
| Retired/Other | -0.058 | -0.083 | <0.1 |
| Unemployed | -0.037 | -0.025 | <0.1 |
|  |  |  |  |
| Region |  |  |  |
| Outside Guangdong | 0.010 | 0.004 | <0.1 |
| Guangdong Province |  |  |  |
|  |  |  |  |
| Marital status |  |  |  |
| Unmarried | 0.081 | 0.119 | >0.1 |
| Married | -0.026 | -0.028 | <0.1 |
| Divorced/Other | -0.056 | -0.091 | <0.1 |
|  |  |  |  |
| Time of call |  |  |  |
| Morning | 0.021 | 0.023 | <0.1 |
| Afternoon | 0.016 | 0.027 | <0.1 |
| Night | 0.017 | 0.024 | <0.1 |
| Dawn | -0.054 | -0.074 | <0.1 |
|  |  |  |  |
| Call duration | 0.348 | 0.403 | >0.1 |
|  |  |  |  |
| Mental disorder history |  |  |  |
| Depression | 0.038 | 0.048 | <0.1 |
| D&A | 0.002 | 0.004 | <0.1 |
| Bipolar disorder | 0.016 | 0.017 | <0.1 |
| Other | 0.000 | 0.001 | <0.1 |
| Unknown | -0.055 | -0.069 | <0.1 |
|  |  |  |  |
| Query |  |  |  |
| Relationship | -0.032 | -0.008 | <0.1 |
| Mental illness | 0.063 | 0.059 | <0.1 |
| Distress issues | -0.002 | -0.002 | <0.1 |
| Economic issues | -0.029 | -0.049 | <0.1 |
|  |  |  |  |
| Season of call |  |  |  |
| Spring | 0.058 | 0.050 | <0.1 |
| Summer | -0.004 | -0.002 | <0.1 |
| Autumn | 0.000 | -0.003 | <0.1 |
| Winter | -0.054 | -0.045 | <0.1 |
|  |  |  |  |
| Mood |  |  |  |
| Depressed | -0.060 | -0.054 | <0.1 |
| Anxious | -0.007 | -0.008 | <0.1 |
| Clam | 0.066 | 0.058 | <0.1 |
| Other | 0.001 | 0.004 | <0.1 |
|  |  |  |  |
| Suicidality |  |  |  |
| Attempt | -0.018 | -0.024 | <0.1 |
| Ideation | 0.090 | 0.097 | <0.1 |
| Plan | -0.071 | -0.074 | <0.1 |


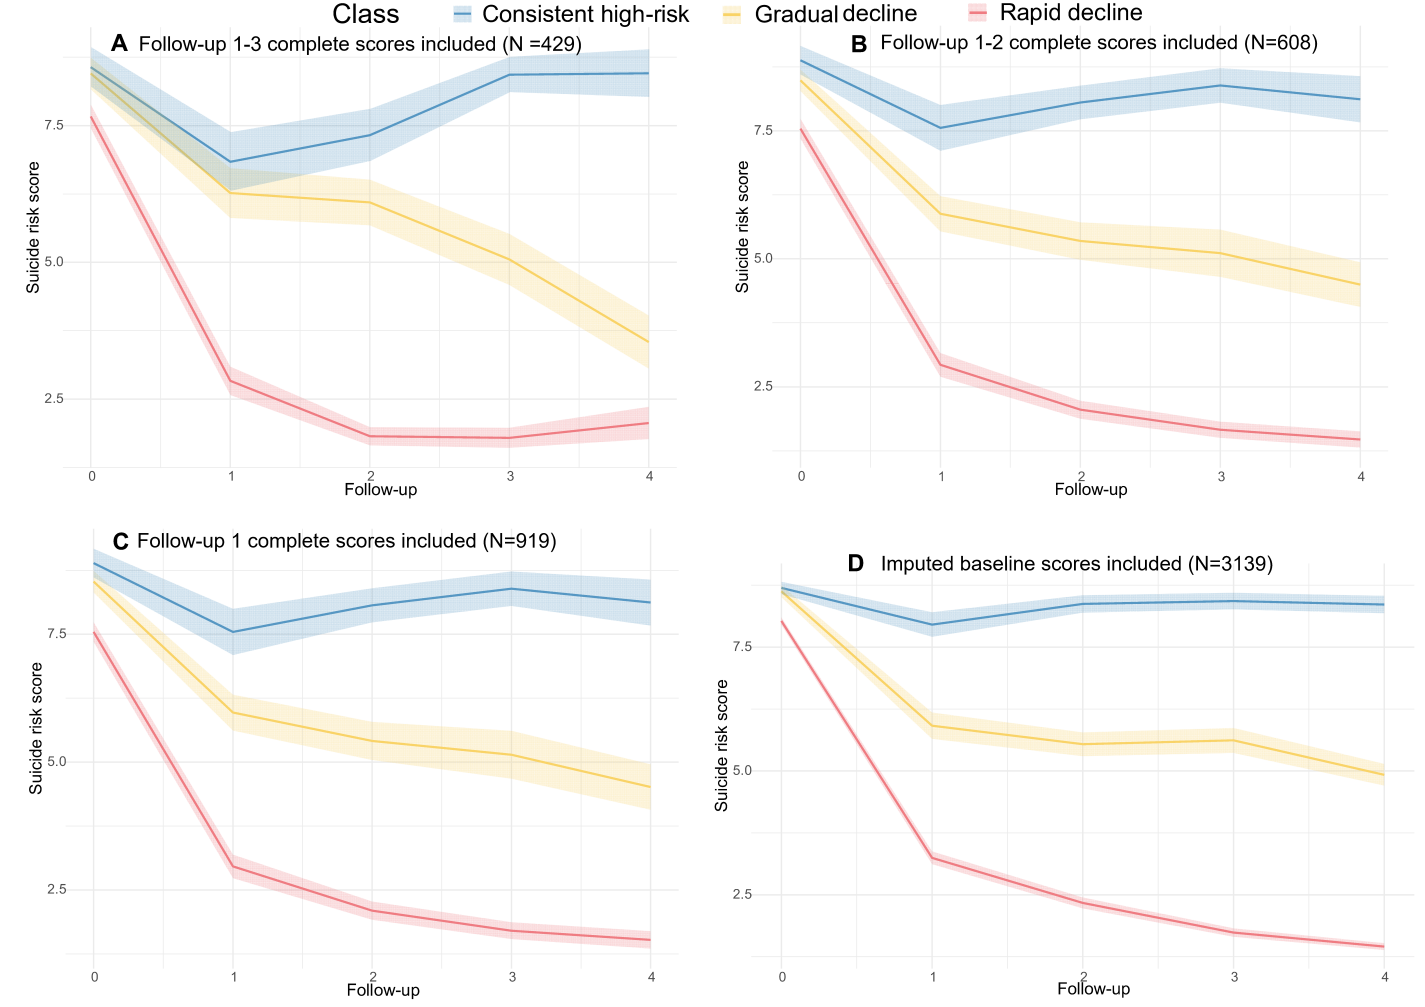


# Figure S2. Trajectories of self-reported suicide scores with 95% CI identified based on sensitivity analysis. A, trajectories identified using complete scores from follow-up 1 to 3; B, trajectories identified using complete scores from follow-up 1 to 2; C, trajectories identified using complete scores from follow-up 1; D, trajectories identified using complete baseline scores after MI .The blue line indicated the constant high-risk group. Yellow line indicated the gradual decline group. Red line indicates the rapid decline group.

# Table S5. The associations between identified determinants with subsequent SAs of callers reported suicidality based on the univariable Cox regression

|  | **Univariable** | |
| --- | --- | --- |
| **Variable** | ***HR*** (95%CI) | ***P*** |
| Class |  |  |
| Rapid decline | 0.16  (0.10,0.25) | <0.001* |
| Gradual decline | 0.81 (0.51,1.28) | 0.367 |
| Constant high-risk | Ref |  |
|  |  |  |
| Sex |  |  |
| Female | 1.27  (0.88, 1.84) | 0.207 |
| Male | Ref |  |
|  |  |  |
| Age | 0.91 (0.88,0.94) | <0.001* |
|  |  |  |
| Job |  |  |
| Student | 1.79 (1.10,2.53) | 0.016 |
| Civil servants | 0.58 (0.20,1.63) | 0.300 |
| Service industry | 0.51(0.18,1.43) | 0.199 |
| Retired/Other | 0.77 (0.43,1.39) | 0.393 |
| Unemployed | Ref |  |
|  |  |  |
| Region |  |  |
| Outside Guangdong | 0.95 (0.67, 1.53) | 0.79 |
| Guangdong Province | Ref |  |
|  |  |  |
| Marital status |  |  |
| Married | 1.60 (0.77,3.35) | 0.21 |
| Divorced/Other | 2.18 (1.12,4.27) | 0.022* |
| Unmarried | Ref |  |
|  |  |  |
| Time of call |  |  |
| Afternoon | 0.78 (0.43,1.40) | 0.403 |
| Night | 0.93 (0.51,1.68) | 0.79 |
| Dawn | 1.14(0.65,1.97) | 0.65 |
| Morning | Ref |  |
|  |  |  |
| Call duration | 1.00 (0.99,1.01) | 0.92 |
|  |  |  |
| Mental disorder history |  |  |
| Depression | 2.29 (1.43,5.37) | <0.001* |
| D&A | 1.16(0.47,2.83) | 0.75 |
| Bipolar disorder | 1.62 (0.85,3.11) | 0.15 |
| Other | 1.17 (0.45,3.03) | 0.75 |
| Unknown | Ref |  |
|  |  |  |
| Query |  |  |
| Relationship | 3.24(0.65,16.20) | 0.15 |
| Mental illness | 2.06 (0.42,10.10) | 0.37 |
| Distress issues | 1.09 (0.19,6.37) | 0.92 |
| Economic issues | Ref |  |
|  |  |  |
| Season of call |  |  |
| Summer | 0.55 (0.28,1.07) | 0.08 |
| Autumn | 0.72 (0.37,1.41) | 0.34 |
| Winter | 0.49(0.30,0.81) | 0.005* |
| Spring | Ref |  |
|  |  |  |
| Mood |  |  |
| Anxious | 2.18(0.89,5.37) | 0.09 |
| Clam | 0.98(0.62,1.54) | 0.94 |
| Other | 1.49 (0.57,3.89) | 0.42 |
| Depressed | Ref |  |
|  |  |  |
| Suicidality |  |  |
| Ideation | 0.41 (0.23,0.73) | 0.002* |
| Plan | 0.62 (0.33,1.17) | 0.14 |
| Attempt | Ref |  |

# Table S6. Associations between identified determinants with subsequent SAs of crisis hotline callers based on COX regression with and without IPW

| **Variable** | **IPW-COX model** | | **Unweighted COX model** | |
| --- | --- | --- | --- | --- |
| ***HR* (95%*CI*)** | ***P*** | ***HR* (95%*CI*)** | ***P*** |
| Class |  |  |  |  |
| Rapid decline | 0.17 (0.10-0.29) | <0.001* | 0.18 (0.11-0.30) | <0.001* |
| Gradual decline | 0.95 (0.57-1.58) | 0.833 | 0.84 (0.52-1.37) | 0.492 |
| Consistent high-risk | Ref | - | Ref | - |
|  |  |  |  |  |
|  |  |  |  |  |
| Age | 0.95 (0.90-0.99) | 0.013* | 0.94 (0.90-0.98) | 0.003* |
|  |  |  |  |  |
| Job |  |  |  |  |
| Student | 1.17 (0.70-1.97) | 0.551 | 0.97 (0.58-1.62) | 0.899 |
| Civil servants | 1.11 (0.39-3.15) | 0.848 | 0.82 (0.28-2.38) | 0.709 |
| Service industry | 0.50 (0.14-1.77) | 0.282 | 0.44 (0.15-1.29) | 0.135 |
| Retired/Other | 1.25 (0.58-2.66) | 0.569 | 0.99 (0.51-1.92) | 0.983 |
| Unemployed | Ref | - | Ref | - |
|  |  |  |  |  |
| Time of call |  |  |  |  |
| Afternoon | 0.84 (0.43-1.65) | 0.613 | 0.77 (0.41-1.43) | 0.405 |
| Night | 1.13 (0.59-2.17) | 0.714 | 0.91 (0.49-1.70) | 0.778 |
| Dawn | 1.44 (0.77-2.70) | 0.249 | 1.36 (0.74-2.48) | 0.321 |
| Morning | Ref | - | Ref | - |
|  |  |  |  |  |
| Call duration | 1.00 (0.99-1.02) | 0.939 | 1.00 (0.99-1.02) | 0.762 |
|  |  |  |  |  |
| Mental disorder history |  |  |  |  |
| Depression | 2.31 (1.36-3.93) | 0.002* | 2.08 (1.32-3.28) | 0.002* |
| D&A | 0.90 (0.32-2.55) | 0.841 | 1.05 (0.40-2.76) | 0.919 |
| Bipolar disorder | 1.89 (1.00-3.57) | 0.049* | 1.58 (0.86-2.87) | 0.138 |
| Other | 1.06 (0.40-2.85) | 0.903 | 0.97 (0.34-2.78) | 0.955 |
| Unknown | Ref | - | Ref | - |
|  |  |  |  |  |
| Query |  |  |  |  |
| Relationship | 2.26 (0.47-10.79) | 0.307 | 1.86 (0.42-8.21) | 0.413 |
| Mental illness | 1.46 (0.32-6.67) | 0.623 | 1.41 (0.33-6.06) | 0.648 |
| Distress issues | 0.98 (0.17-5.56) | 0.982 | 0.80 (0.15-4.26) | 0.792 |
| Economic issues | Ref | - | Ref | - |
|  |  |  |  |  |
| Season of call |  |  |  |  |
| Summer | 0.48 (0.23-0.97) | 0.042* | 0.52 (0.26-1.02) | 0.059 |
| Autumn | 0.74 (0.37-1.49) | 0.401 | 0.76 (0.41-1.41) | 0.384 |
| Winter | 0.53 (0.30-0.94) | 0.030* | 0.55 (0.35-0.87) | 0.011* |
| Spring | Ref | - | Ref | - |
|  |  |  |  |  |
| Mood |  |  |  |  |
| Anxious | 1.44 (0.42-4.95) | 0.560 | 1.03 (0.36-2.92) | 0.954 |
| Clam | 0.86 (0.53-1.41) | 0.557 | 0.76 (0.50-1.15) | 0.193 |
| Other | 1.34 (0.48-3.72) | 0.574 | 1.06 (0.44-2.53) | 0.896 |
| Depressed | Ref | - | Ref | - |
|  |  |  |  |  |
| Suicidality |  |  |  |  |
| Ideation | 0.49 (0.26-0.91) | 0.024* | 0.55 (0.31-0.96) | 0.037* |
| Plan | 0.74 (0.37-1.49) | 0.399 | 0.78 (0.42-1.45) | 0.438 |
| Attempt | Ref | - | Ref | - |

Note: **P*<0.05


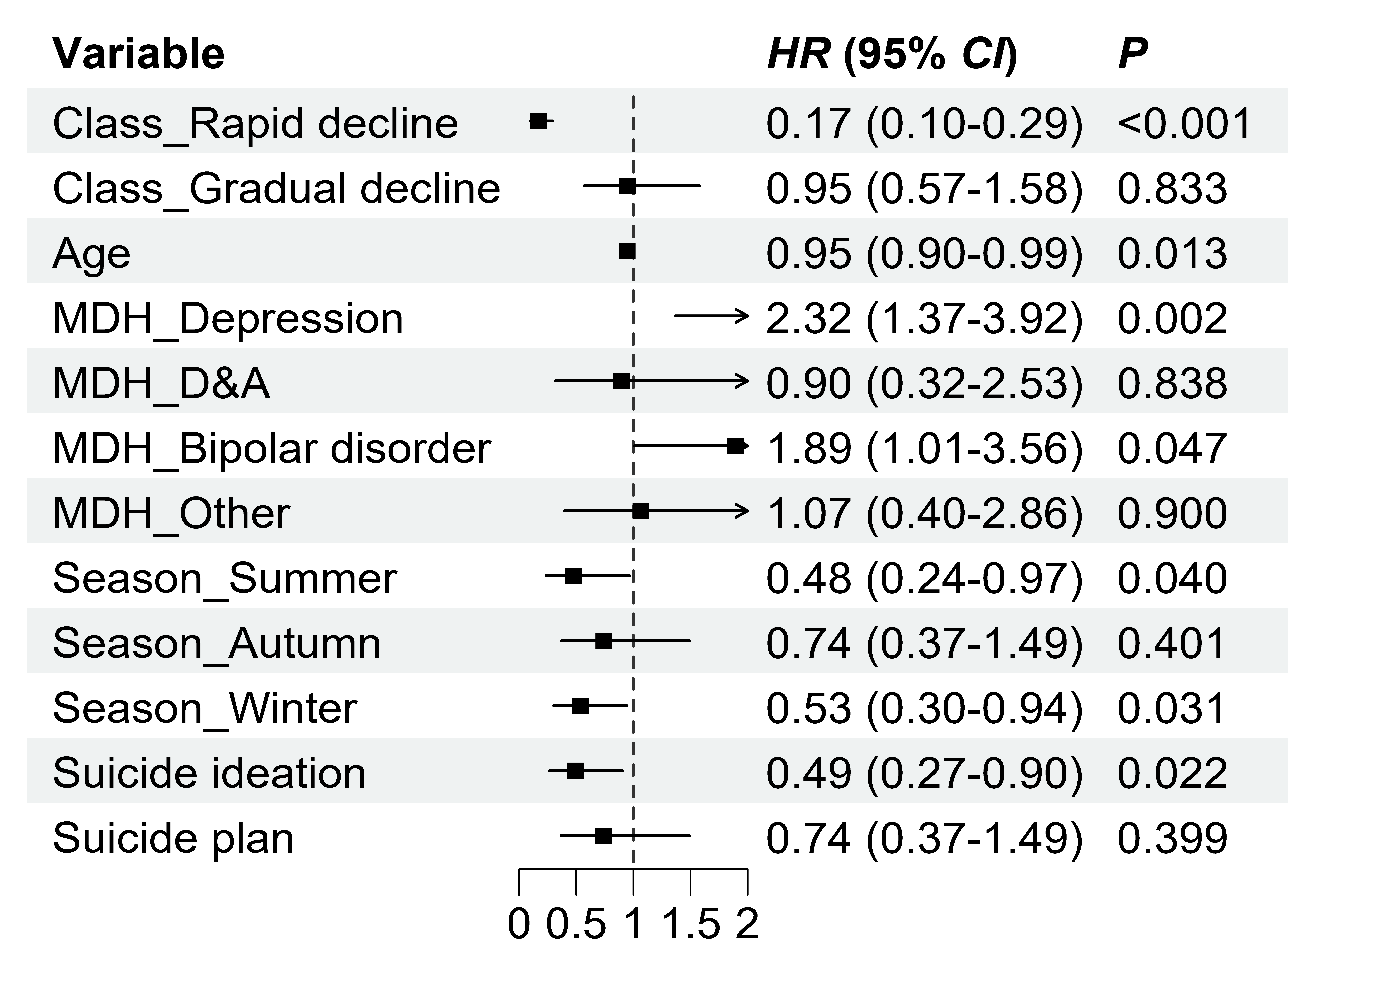


# Figure S3. The forest plot of IPW-COX model with call duration unadjusted

# Table S7. The performance comparison of XGBoost model for subsequent suicide attempts prediction

| **Indicator** | **XGBoost model** |
| --- | --- |
| Accuracy (95%*CI*) | 0.76 (0.71,0.81) |
| Sensitivity | 0.53 |
| Specificity | 0.79 |
| PPV | 0.22 |
| NPV | 0.94 |
| Kappa | 0.20 |
| F1 | 0.31 |
| AUC (95%CI) | 0.74 (0.66,0.89) |


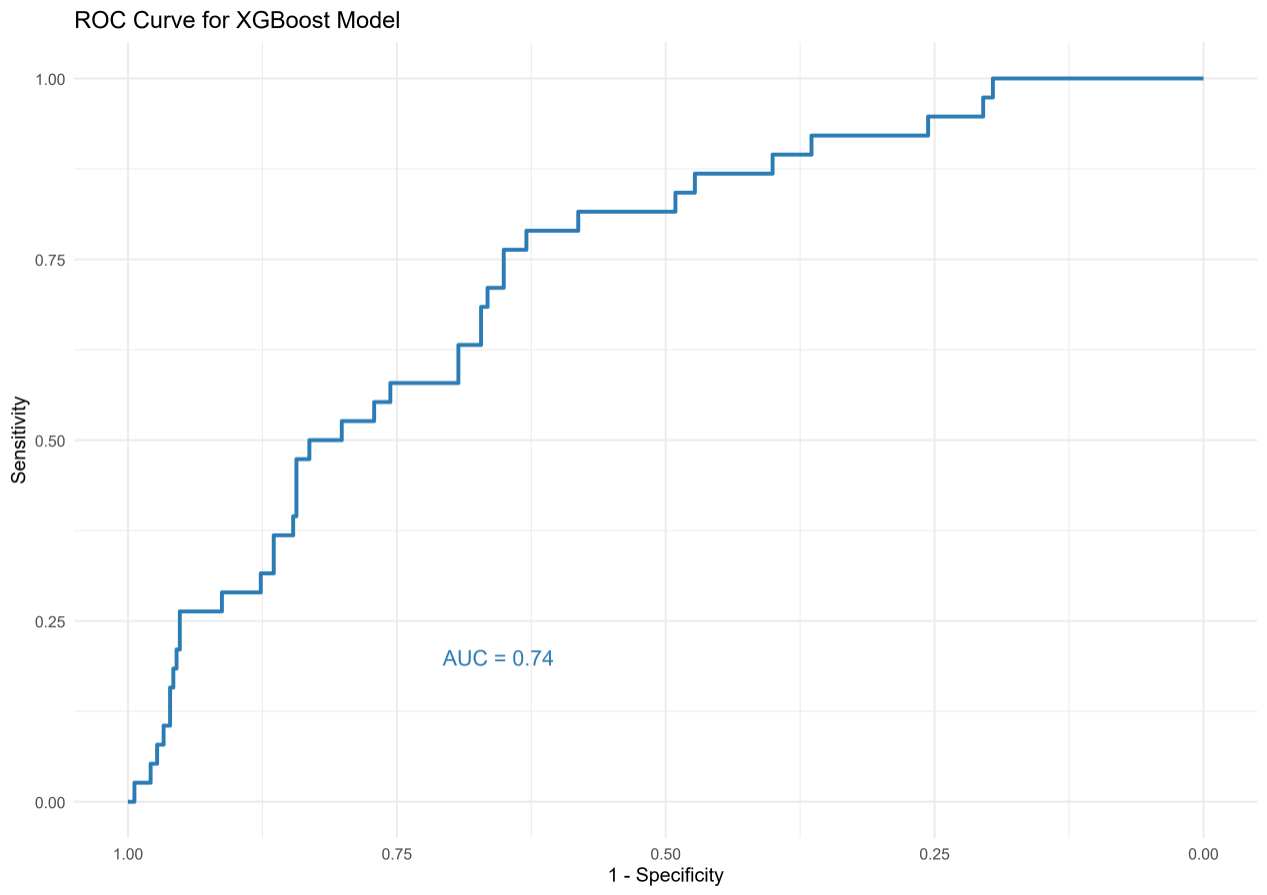


# Figure S4. ROC curve of XGBoost model

# Table S8. The mean absolute SHAP values of variables of XGboost model for subsequent suicide attempt prediction

| **Feature** | **Mean |SHAP| Value** |
| --- | --- |
| Class | 0.439 |
| Age | 0.336 |
| Mental disorder history | 0.145 |
| Call duration | 0.139 |
| Time of call | 0.137 |
| Suicidality | 0.088 |
| Query | 0.061 |
| Mood when calling | 0.060 |
| Job | 0.059 |
| Season of call | 0.036 |
| Region | 0.033 |
| Sex | 0.019 |
| Marital Status | 0.015 |
